# Supplementary material for: AKT1 restricts the invasive capacity of head and neck carcinoma cells harboring a constitutively active PI3 kinase activity
Source: PubMed Central journal article supplement (PMC5836445; doi:10.1186/s12885-018-4169-0), 2018-03-05
Supplement: 12885_2018_4169_MOESM12_ESM.pdf [file 12885_2018_4169_MOESM12_ESM.pdf]

**A**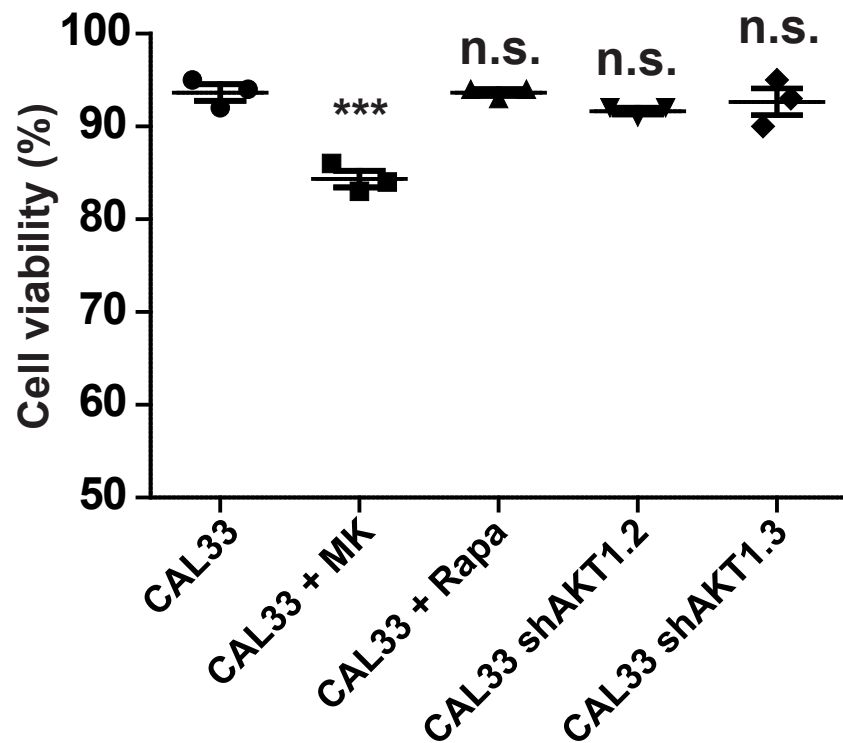**B**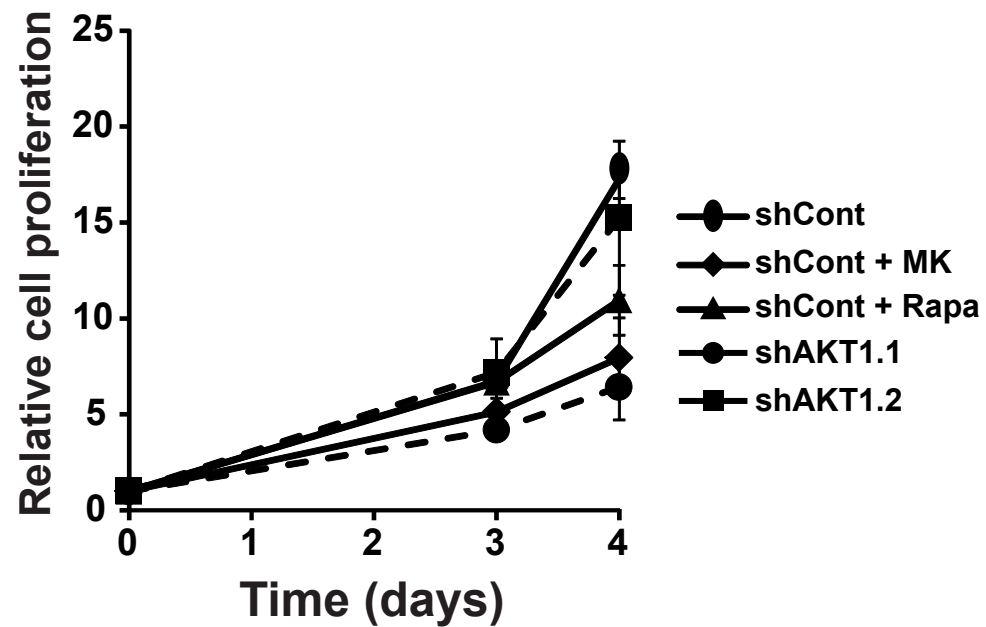

Figure S3. Brolih, Parks et al.
